# Supplementary material for: Effectiveness of a Mobile Application for Postpartum Depression Self-Management: Evidence from a Randomised Controlled Trial in South Korea
Source: MDPI journal article supplement (doi:10.3390/healthcare10112185), 2022-10-31
Supplement: s1 [file s1]

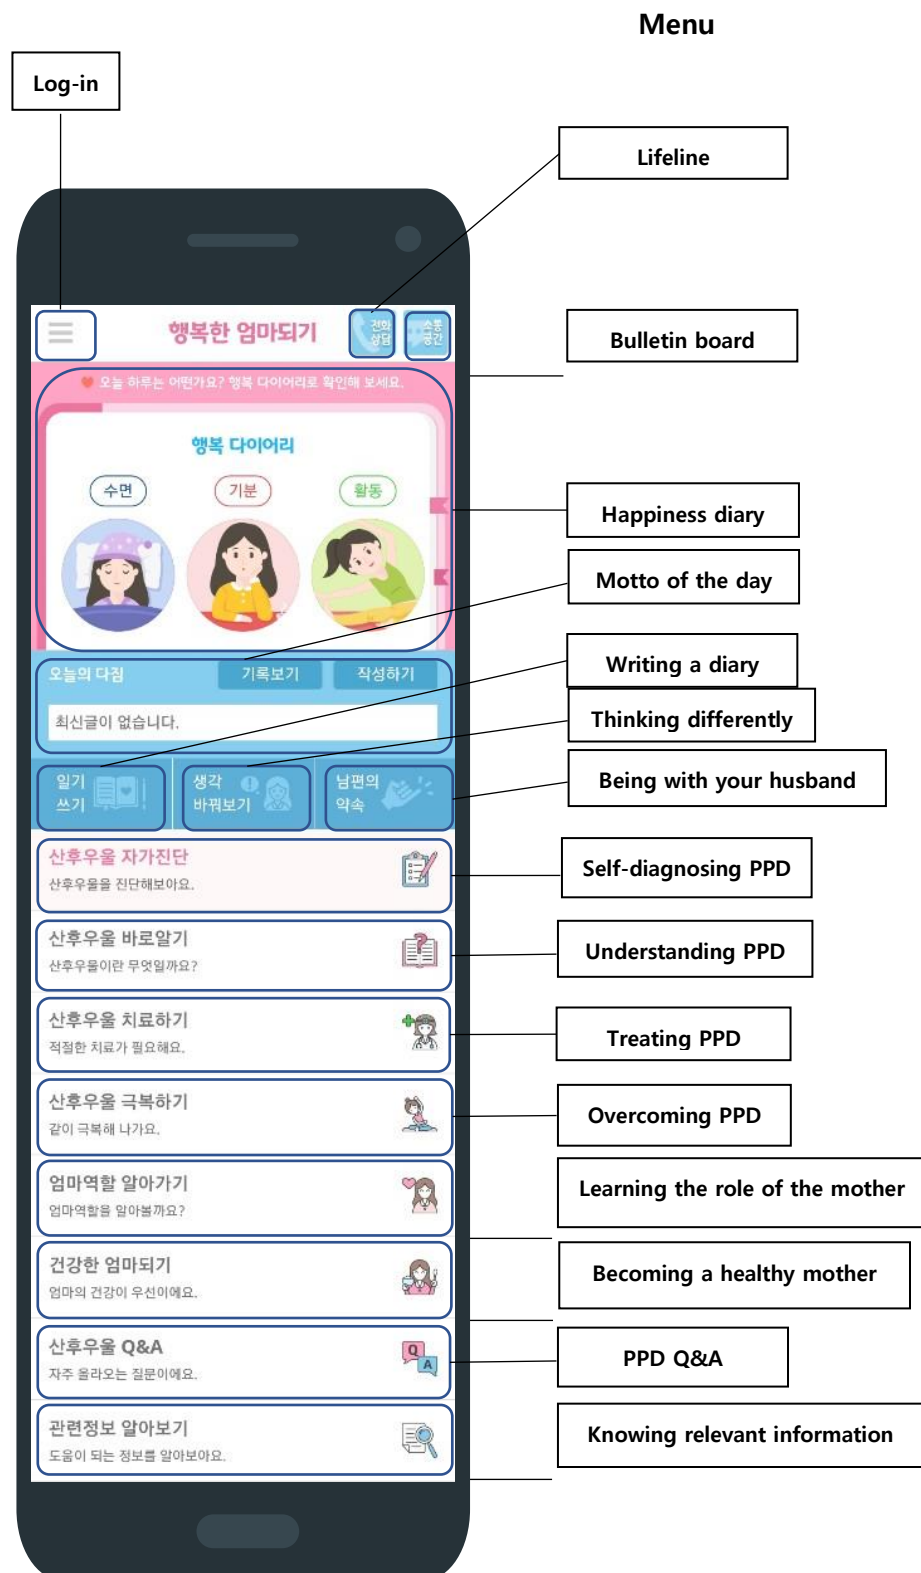

Figure S1. Main screen of the Happy Mother app.

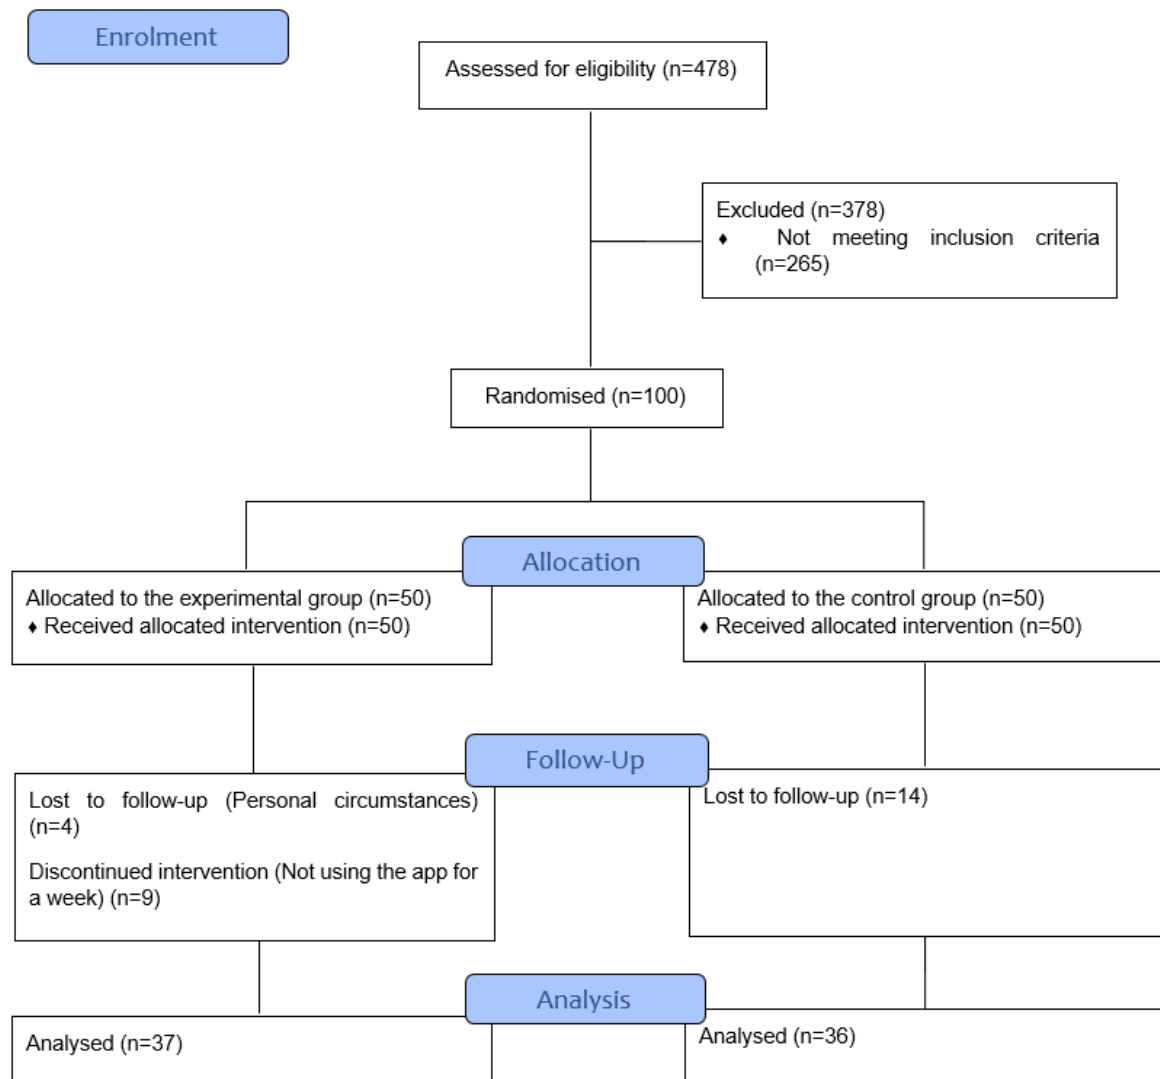

**Figure S2.** Participant selection flow

| Main Components                    | Main Contents of App                                                                                        | Menu of App                                                 |
|------------------------------------|-------------------------------------------------------------------------------------------------------------|-------------------------------------------------------------|
| Psychoeducation                    | Self-diagnosis of postpartum depression                                                                     | Self-diagnosing postpartum depression                       |
|                                    | Definition, cause, and symptoms of postpartum depression                                                    | Understanding postpartum depression                         |
|                                    | Diagnosis and treatment of postpartum depression                                                            | Treating postpartum depression                              |
|                                    | Strategies to overcome postpartum depression                                                                | Overcoming postpartum depression                            |
|                                    | Understanding the role of the mother, achieving attachment with the child, caring for the baby              | Learning the role of the mother                             |
|                                    | Postnatal recovery and nutrition management                                                                 | Becoming a healthy mother                                   |
|                                    | Mother's questions and answers about postpartum depression                                                  | Postpartum depression Q & A                                 |
| Managing mood                      | Daily tracking of mood and quality of sleep<br>Finding the root cause behind poor mood and quality of sleep | Happiness diary – mood and sleep                            |
| Managing negative thoughts         | Identify and modify negative thoughts                                                                       | Thinking differently<br>Motto of the day<br>Writing a diary |
| Increasing pleasant activity       | Daily tracking of pleasant activities, goal setting activity                                                | Happiness diary – Activity                                  |
| Facilitating help-seeking behavior | The role of the husband to prevent and manage the wife's postpartum depression                              | A husband's promise                                         |
|                                    | Mental health service center, community health center, childcare support center, childcare app              | Knowing relevant information                                |
|                                    | Lifeline                                                                                                    | Lifeline                                                    |
|                                    | Bulletin board for communication                                                                            | Bulletin board                                              |

**Figure S3.** The cognitive behavioural therapy (CBT) themes of the Happy Mother app

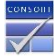

## CONSORT 2010 checklist of information to include when reporting a randomised trial\*

| Section/Topic             | Item No | Checklist item                                                                                                                        | Reported on page No |
|---------------------------|---------|---------------------------------------------------------------------------------------------------------------------------------------|---------------------|
| <b>Title and abstract</b> |         |                                                                                                                                       |                     |
|                           | 1a      | Identification as a randomised trial in the title                                                                                     | 1                   |
|                           | 1b      | Structured summary of trial design, methods, results, and conclusions                                                                 | 1                   |
| <b>Introduction</b>       |         |                                                                                                                                       |                     |
| Background and objectives | 2a      | Scientific background and explanation of rationale                                                                                    | 2                   |
|                           | 2b      | Specific objectives or hypotheses                                                                                                     | 2                   |
| <b>Methods</b>            |         |                                                                                                                                       |                     |
| Trial design              | 3a      | Description of trial design (such as parallel, factorial) including allocation ratio                                                  | 2                   |
|                           | 3b      | Important changes to methods after trial commencement (such as eligibility criteria), with reasons                                    | N.A                 |
| Participants              | 4a      | Eligibility criteria for participants                                                                                                 | 2                   |
|                           | 4b      | Settings and locations where the data were collected                                                                                  | 2                   |
| Interventions             | 5       | The interventions for each group with sufficient details to allow replication, including how and when they were actually administered | 2-4                 |
| Outcomes                  | 6a      | Completely defined pre-specified primary and secondary outcome measures, including how and when they were assessed                    | 4-6                 |
|                           | 6b      | Any changes to trial outcomes after the trial commenced, with reasons                                                                 | N.A                 |
| Sample size               | 7a      | How sample size was determined                                                                                                        | 2                   |

|                                                      |     |                                                                                                                                                                                             |           |
|------------------------------------------------------|-----|---------------------------------------------------------------------------------------------------------------------------------------------------------------------------------------------|-----------|
|                                                      | 7b  | When applicable, explanation of any interim analyses and stopping guidelines                                                                                                                | N.A       |
| Randomization:                                       |     |                                                                                                                                                                                             |           |
| Sequence generation                                  | 8a  | Method used to generate the random allocation sequence                                                                                                                                      | 2         |
|                                                      | 8b  | Type of randomization; details of any restriction (such as blocking and block size)                                                                                                         | 2         |
| Allocation concealment mechanism                     | 9   | Mechanism used to implement the random allocation sequence (such as sequentially numbered containers), describing any steps taken to conceal the sequence until interventions were assigned | 2-4       |
| Implementation                                       | 10  | Who generated the random allocation sequence, who enrolled participants, and who assigned participants to interventions                                                                     | 2-4       |
| Blinding                                             | 11a | If done, who was blinded after assignment to interventions (for example, participants, care providers, those assessing outcomes) and how                                                    | 2-4       |
|                                                      | 11b | If relevant, description of the similarity of interventions                                                                                                                                 | N.A       |
| Statistical methods                                  | 12a | Statistical methods used to compare groups for primary and secondary outcomes                                                                                                               | 6         |
|                                                      | 12b | Methods for additional analyses, such as subgroup analyses and adjusted analyses                                                                                                            | N.A       |
| <b>Results</b>                                       |     |                                                                                                                                                                                             |           |
| Participant flow (a diagram is strongly recommended) | 13a | For each group, the numbers of participants who were randomly assigned, received intended treatment, and were analysed for the primary outcome                                              | Figure S3 |
|                                                      | 13b | For each group, losses and exclusions after randomisation, together with reasons                                                                                                            | 3,4       |
| Recruitment                                          | 14a | Dates defining the periods of recruitment and follow-up                                                                                                                                     | 2-4       |
|                                                      | 14b | Why the trial ended or was stopped                                                                                                                                                          | N.A       |
| Baseline data                                        | 15  | A table showing baseline demographic and clinical characteristics for each group                                                                                                            | 6-8       |

|                          |     |                                                                                                                                                   |       |
|--------------------------|-----|---------------------------------------------------------------------------------------------------------------------------------------------------|-------|
| Numbers analyzed         | 16  | For each group, number of participants (denominator) included in each analysis and whether the analysis was by original assigned groups           | 2,3   |
| Outcomes and estimation  | 17a | For each primary and secondary outcome, results for each group, and the estimated effect size and its precision (such as 95% confidence interval) | 6-11  |
|                          | 17b | For binary outcomes, presentation of both absolute and relative effect sizes is recommended                                                       | N.A   |
| Ancillary analyses       | 18  | Results of any other analyses performed, including subgroup analyses and adjusted analyses, distinguishing pre-specified from exploratory         | N.A   |
| Harms                    | 19  | All important harms or unintended effects in each group (for specific guidance see CONSORT for harms)                                             | N.A   |
| <b>Discussion</b>        |     |                                                                                                                                                   |       |
| Limitations              | 20  | Trial limitations, addressing sources of potential bias, imprecision, and, if relevant, multiplicity of analyses                                  | 13,14 |
| Generalizability         | 21  | Generalizability (external validity, applicability) of the trial findings                                                                         | 12-14 |
| Interpretation           | 22  | Interpretation consistent with results, balancing benefits and harms, and considering other relevant evidence                                     | 12-14 |
| <b>Other information</b> |     |                                                                                                                                                   |       |
| Registration             | 23  | Registration number and name of trial registry                                                                                                    | N.A   |
| Protocol                 | 24  | Where the full trial protocol can be accessed, if available                                                                                       | N.A   |
| Funding                  | 25  | Sources of funding and other support (such as supply of drugs), role of funders                                                                   | 14    |

\*We strongly recommend reading this statement in conjunction with the CONSORT 2010 Explanation and Elaboration for important clarifications on all the items. If relevant, we also recommend reading CONSORT extensions for cluster randomised trials, non-inferiority and equivalence trials, non-pharmacological treatments, herbal interventions, and pragmatic trials. Additional extensions are forthcoming: for those and for up to date references relevant to this checklist, see [www.consort-statement.org](http://www.consort-statement.org).

Table S1. CONSORT checklist

## 1) How the app was helpful

---

### **(Theme 1) Self-monitoring and planning life using the Happiness Diary**

*'It was nice to see the mood, sleep, and activity trends on the graph. It was especially good to be active, but it was better to plan what I was going to do today and to see what I was doing in the evening'. (Mothers 6, 8)*

---

### **(Theme 2) Functions to help manage depression**

*'I used "thinking positively". I had always blamed my husband, [but] I learned to think positively and was able to control my mind a little bit'. (Mothers 6, 8)*

*'The ability to share with my husband was helpful. I felt less lonely than before because my husband supported me'. (Mothers 1, 4, 6)*

---

### **(Theme 3) Helpful parenting information**

*'Information about the role of a mother and how to raise a baby was memorable and helpful'. (Mothers 1, 5, 6)*

*'I actually used to make good use of the Moonlight Children's Hospital or the application for childcare'. (Mothers 5, 6, 7)*

---

### **(Theme 4) Psychological comfort through the bulletin board**

*'I left a message on the bulletin board when I was having a hard time, and it comforted me a lot because the manager left a comment'. (Mother 4)*

---

## 2) Improvements needed

---

### **(Theme 1) Supplement the functions of the Happy Diary**

*‘Since the quality of sleep was presented only as a numerical value, it was difficult to accurately determine how much my quality of sleep was’. (Mother 1)*

---

### **(Theme 2) More training on altering dysfunctional thoughts**

*‘I did not use the “Thinking Differently” of the app much. I hesitated to use it because it was not a familiar method to me. I think we need more training on thinking differently in real life’. (Mothers 3)*

---

### **(Theme 3) Periodical updates**

*‘The bulletin board wasn’t activated, so I didn’t have the courage to write’. (Mothers 3, 6-8)*

*‘The app should be updated regularly as I want to get a lot of new information’. (Mothers 4, 8)*

---

**Table S2.** Actual statement of the open ended-interviews



| Menu                            | Detailed menu                   | Whole period         |                           | Within 8 weeks       |                           | After 9 weeks        |                           |
|---------------------------------|---------------------------------|----------------------|---------------------------|----------------------|---------------------------|----------------------|---------------------------|
|                                 |                                 | Total number of uses | Total number of users (%) | Total number of uses | Total number of users (%) | Total number of uses | Total number of users (%) |
| Happiness diary                 |                                 | 4073                 | 37(100%)                  | 2067                 | 37(100%)                  | 2006                 | 36(97.30%)                |
|                                 | Mood                            | 1317                 | 37(100%)                  | 673                  | 37(100%)                  | 644                  | 35(94.59%)                |
|                                 | Sleep                           | 1255                 | 37(100%)                  | 628                  | 37(100%)                  | 627                  | 36(97.30%)                |
|                                 | Activity                        | 1501                 | 37(100%)                  | 766                  | 37(100%)                  | 735                  | 35(94.59%)                |
| Self-diagnosing PPD             |                                 | 135                  | 37(100%)                  | 99                   | 37(100%)                  | 36                   | 16(43.24%)                |
| Understanding PPD               |                                 | 51                   | 17(45.95%)                | 43                   | 14(37.84%)                | 8                    | 3(8.11%)                  |
| Treating PPD                    |                                 | 79                   | 19(51.35%)                | 63                   | 16(43.24%)                | 16                   | 5(13.51%)                 |
| Overcoming PPD                  |                                 | 652                  | 37(100%)                  | 583                  | 37(100%)                  | 150                  | 31(83.78%)                |
|                                 | Thinking positively             | 83                   | 16(43.24%)                | 65                   | 16(43.24%)                | 18                   | 5(13.51%)                 |
|                                 | Being with your husband         | 35                   | 9(24.32%)                 | 26                   | 9(24.32%)                 | 9                    | 4(10.81%)                 |
| Learning the role of the mother |                                 | 231                  | 31(83.78%)                | 128                  | 31(83.78%)                | 22                   | 9(24.32%)                 |
| Becoming a healthy mother       |                                 | 112                  | 23(62.16%)                | 99                   | 21(56.76%)                | 13                   | 6(16.22%)                 |
| PPD Q & A                       |                                 | 72                   | 36(97.30%)                | 70                   | 35(94.59%)                | 2                    | 2(5.41%)                  |
| Knowing relevant information    |                                 | 198                  | 36(97.30%)                | 189                  | 36(97.30%)                | 9                    | 4(10.81%)                 |
| Bulletin board                  |                                 | 220                  | 36(97.30%)                | 143                  | 36(97.30%)                | 77                   | 14(37.84%)                |
|                                 | (Participants actually created) | 14                   | 7(18.92%)                 | 10                   | 5(13.51%)                 | 4                    | 4(10.81%)                 |
| Lifeline                        |                                 | 61                   | 36(97.30%)                | 50                   | 36(97.30%)                | 11                   | 9(24.32%)                 |

|                  |     |            |     |            |    |            |
|------------------|-----|------------|-----|------------|----|------------|
| Motto of the day | 238 | 35(94.59%) | 174 | 33(89.19%) | 64 | 17(45.95%) |
| Writing a diary  | 153 | 36(97.30%) | 111 | 35(94.59%) | 42 | 17(45.95%) |

**Table S3.** Percentage of experimental groups using the app (N=37)
